# Supplementary material for: Formation of stabilized vaterite nanoparticles via the introduction of uranyl into groundwater
Source: Royal Society of Chemistry journal article supplement (doi:10.1039/d4en00726c), 2025-01-01
Supplement: d4en00726c1.pdf [file d4en00726c1.pdf]

Supplementary Information for

# Formation of stabilized vaterite nanoparticles via the introduction of uranyl into groundwater

Siyuan Wu<sup>a</sup>, Jin Du<sup>a</sup>, Jiebiao Li<sup>b\*</sup>, Mark Julian Henderson<sup>a</sup>, Guangfeng Liu<sup>c</sup>, Jianqiao Zhang<sup>c</sup>, Na Li<sup>c</sup>,

Alain Gibaud<sup>d</sup>, Qiang Tian<sup>a\*</sup>

*<sup>a</sup>State Key Laboratory of Environment-friendly Energy Materials, School of Materials and Chemistry,*

*Southwest University of Science and Technology, Mianyang 621010, China*

*<sup>b</sup>Beijing Research Institute of Uranium Geology, Beijing 100029, China*

*<sup>c</sup>Shanghai Advanced Research Institute, Chinese Academy of Sciences, Shanghai 201210, China*

*<sup>d</sup>IMMM, Le Mans Université, Bld O. Messiaen, 72085 Le Mans, Cedex 9, France*

## Corresponding Authors:

\*[hgyljbiebiao@126.com](mailto:hgyljbiebiao@126.com) (J Li); [tianqiang@swust.edu.cn](mailto:tianqiang@swust.edu.cn) (Q. Tian)

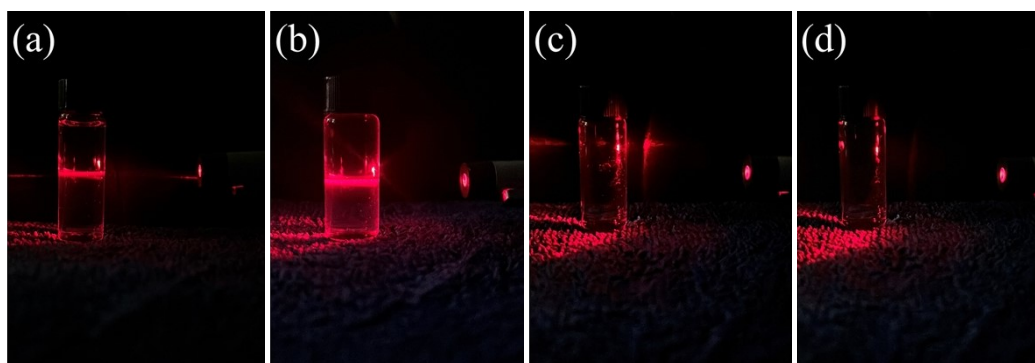

**Fig. S1** Tyndall phenomena of the mixture of the Beishan groundwater and uranyl nitrate: (a) freshly prepared; (b) stored for one year at room temperature. The controlled sample of groundwater (c) and uranyl nitrate solution (d) under red laser.

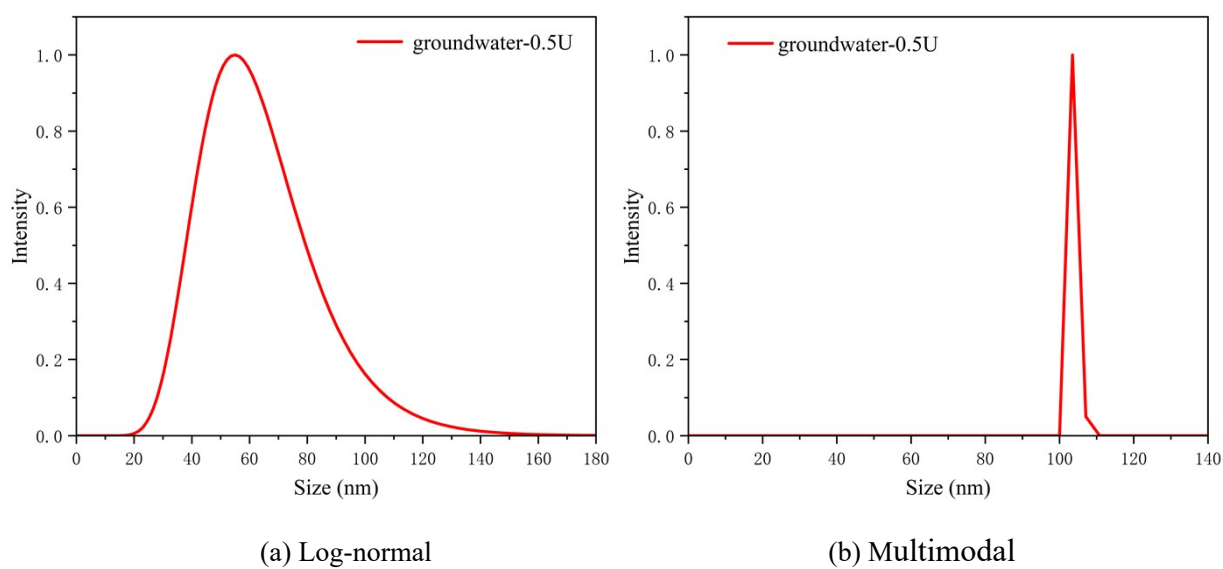

**Fig. S2.** The intensity-weighted log-normal (a) and multimodal (b) size distributions of hydrodynamic size.

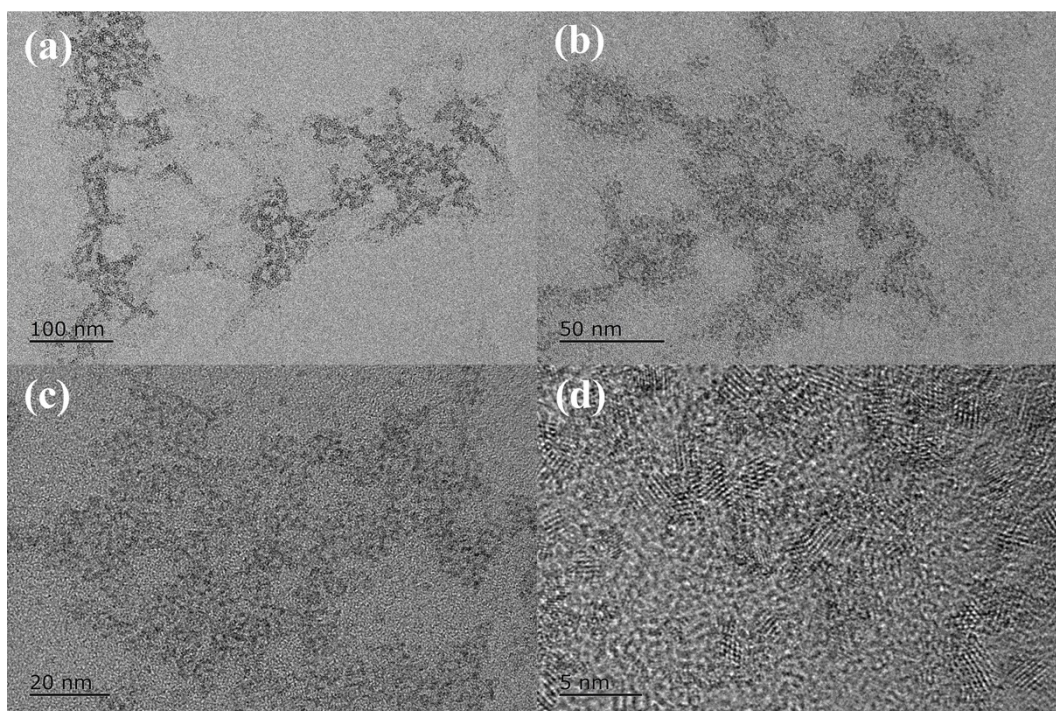

**Fig. S3** TEM images obtained from the groundwater-0.5 U

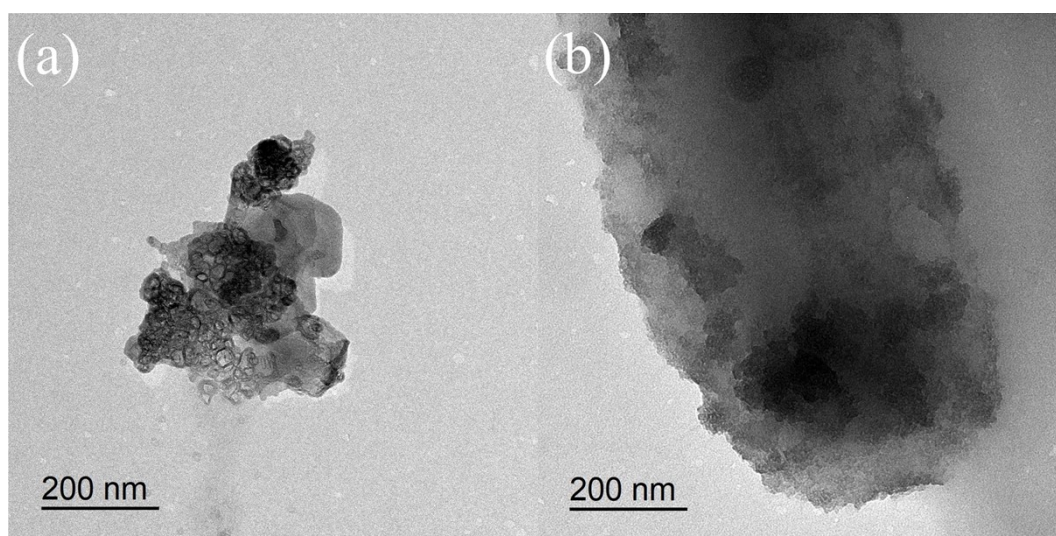

**Fig. S4** TEM images obtained from the pure Beishan groundwater.

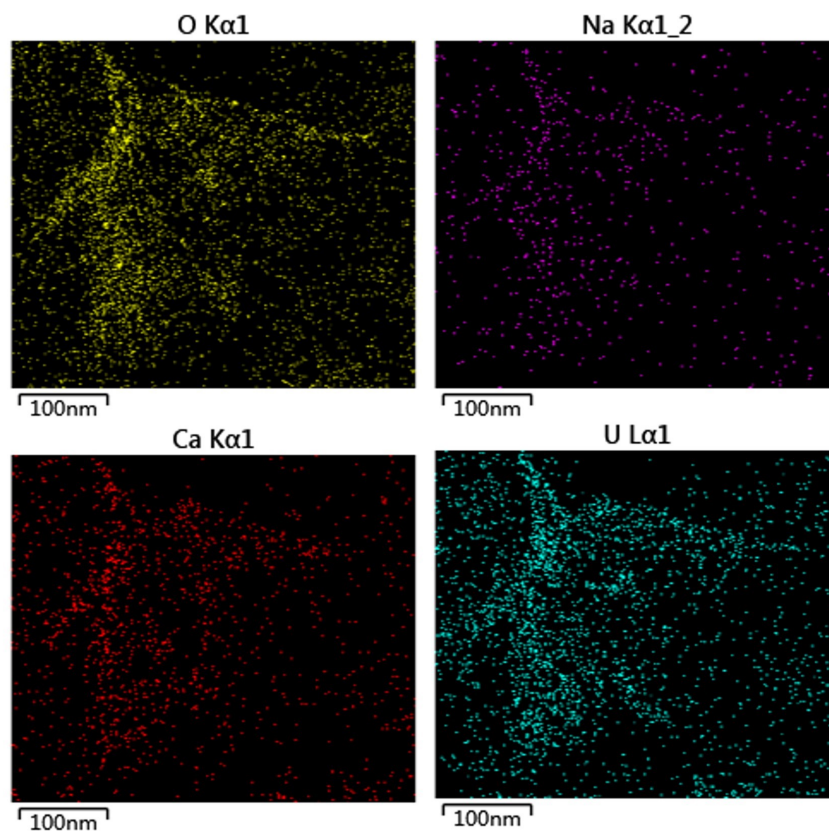

**Fig. S5** TEM element mapping images of O, Na, Ca, and U obtained from groundwater-3U.

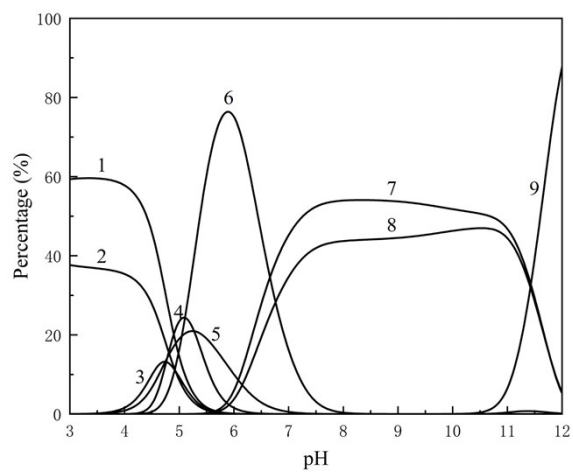

1— $\text{UO}_2\text{SO}_4(\text{aq})$ ; 2— $\text{UO}_2^{2+}$ ; 3— $(\text{UO}_2)_2(\text{OH})_2^{2+}$ ; 4— $(\text{UO}_2)_3(\text{OH})_5^+$ ; 5— $\text{UO}_2\text{CO}_3(\text{aq})$ ;  
 6— $(\text{UO}_2)_2\text{CO}_3(\text{OH})_3^-$ ; 7— $\text{Ca}_2\text{UO}_2(\text{CO}_3)_3(\text{aq})$ ; 8— $\text{CaUO}_2(\text{CO}_3)_3^{2-}$ ; 9— $\text{UO}_2(\text{OH})_3^-$

**Fig. S6** Influence of pH on the distribution of uranium species (>5%) in groundwater-0.5 U ([U] = 0.5 mmol/L, T = 25 °C).

**Table S1** Thermodynamic data of uranium at 25 °C.

| Chemical reactions                                                                                                     | log K  |
|------------------------------------------------------------------------------------------------------------------------|--------|
| $\text{UO}_2^{2+} + \text{H}_2\text{O} = \text{UO}_2\text{OH}^+ + \text{H}^+$                                          | -5.25  |
| $\text{UO}_2^{2+} + 3\text{H}_2\text{O} = \text{UO}_2(\text{OH})_3^- + 3\text{H}^+$                                    | -20.25 |
| $\text{UO}_2^{2+} + 2\text{OH}^- = \text{UO}_2(\text{OH})_2$                                                           | -10.31 |
| $2\text{UO}_2^{2+} + \text{H}_2\text{O} = (\text{UO}_2)_2\text{OH}^{3+} + \text{H}^+$                                  | -2.70  |
| $2\text{UO}_2^{2+} + 2\text{H}_2\text{O} = (\text{UO}_2)_2(\text{OH})_2^{2+} + 2\text{H}^+$                            | -5.62  |
| $3\text{UO}_2^{2+} + 4\text{H}_2\text{O} = (\text{UO}_2)_3(\text{OH})_4^{2+} + 4\text{H}^+$                            | -11.90 |
| $3\text{UO}_2^{2+} + 5\text{H}_2\text{O} = (\text{UO}_2)_3(\text{OH})_5^+ + 5\text{H}^+$                               | -15.55 |
| $3\text{UO}_2^{2+} + 7\text{H}_2\text{O} = (\text{UO}_2)_3(\text{OH})_7^- + 7\text{H}^+$                               | -32.20 |
| $4\text{UO}_2^{2+} + 7\text{H}_2\text{O} = (\text{UO}_2)_4(\text{OH})_7^+ + 7\text{H}^+$                               | -21.90 |
| $\text{UO}_2^{2+} + \text{SO}_4^{2-} = \text{UO}_2\text{SO}_4$                                                         | 3.15   |
| $\text{UO}_2^{2+} + 2\text{SO}_4^{2-} = \text{UO}_2(\text{SO}_4)_2^{2-}$                                               | 4.14   |
| $\text{UO}_2^{2+} + \text{Cl}^- = \text{UO}_2\text{Cl}^+$                                                              | 0.17   |
| $\text{UO}_2^{2+} + \text{Cl}^- = \text{UO}_2\text{Cl}_2$                                                              | -1.10  |
| $\text{UO}_2^{2+} + \text{CO}_3^{2-} = \text{UO}_2\text{CO}_3$                                                         | 9.94   |
| $\text{UO}_2^{2+} + 2\text{CO}_3^{2-} = \text{UO}_2(\text{CO}_3)_2^{2-}$                                               | 16.61  |
| $\text{UO}_2^{2+} + 3\text{CO}_3^{2-} = \text{UO}_2(\text{CO}_3)_3^{4-}$                                               | 21.84  |
| $2\text{UO}_2^{2+} + 3\text{H}_2\text{O} + \text{CO}_3^{2-} = (\text{UO}_2)_2\text{CO}_3(\text{OH})_3^- + 3\text{H}^+$ | -0.86  |
| $\text{Ca}^{2+} + \text{UO}_2(\text{CO}_3)_3^{4-} = \text{CaUO}_2(\text{CO}_3)_3^{2-}$                                 | 5.33*  |
| $2\text{Ca}^{2+} + \text{UO}_2(\text{CO}_3)_3^{4-} = \text{Ca}_2\text{UO}_2(\text{CO}_3)_3$                            | 8.70*  |
| $\text{Mg}^{2+} + \text{UO}_2(\text{CO}_3)_3^{4-} = \text{MgUO}_2(\text{CO}_3)_3^{2-}$                                 | 2.61*  |

\*Jo Y, Kirishima A, Kimuro S, et al. Formation of  $\text{CaUO}_2(\text{CO}_3)_3^{2-}$  and  $\text{Ca}_2\text{UO}_2(\text{CO}_3)_3(\text{aq})$  complexes at variable temperatures (10 – 70 °C). Dalton Transactions, 2019, 48(20): 6942–6950.

\* Jo Y, Kim H K, Yun J I. Complexation of  $\text{UO}_2(\text{CO}_3)_3^{4-}$  with  $\text{Mg}^{2+}$  at varying temperatures and its effect on U(VI) speciation in groundwater and seawater. Dalton Transactions, 2019, 48(39): 14769–14776.

**Table S2** *d*-spacings derived from the SAED and HRTEM image of groundwater-3U.

| JCPDS 87-1714<br>Clarkeite $[\text{Na}(\text{UO}_2)\text{O}(\text{OH})]$ |              | SAED         | HRTEM        |
|--------------------------------------------------------------------------|--------------|--------------|--------------|
| hkl                                                                      | <i>d</i> (Å) | <i>d</i> (Å) | <i>d</i> (Å) |
| 003                                                                      | 5.89         |              | 5.86         |
| 012                                                                      | 3.19         | 3.20         |              |
| 104                                                                      | 2.71         | 2.71         |              |
| 113                                                                      | 1.87         | 1.92         |              |
| 116                                                                      | 1.64         | 1.61         |              |

**Table S3** The possible precipitated minerals with SI > 0 from the Beishan groundwater simulated by PHREEQC ([U] = 0.5 mmol/L, T = 25 °C, pH = 7.0).

| Phase        | Chemical formula                                                            | Log K  | Log IAP | SI   |
|--------------|-----------------------------------------------------------------------------|--------|---------|------|
| Andersonite  | $\text{Na}_2\text{CaUO}_2(\text{CO}_3)_3 \cdot 6\text{H}_2\text{O}$         | -37.50 | -34.47  | 3.03 |
| Bayelite     | $\text{Mg}_2\text{UO}_2(\text{CO}_3)_3 \cdot 18\text{H}_2\text{O}$          | -36.60 | -34.93  | 1.67 |
| Becquerelite | $\text{Ca}(\text{UO}_2)_6\text{O}_4(\text{OH})_6 \cdot 8\text{H}_2\text{O}$ | 40.5   | 40.88   | 0.38 |
| Clarkeite    | $\text{Na}(\text{UO}_2)\text{O}(\text{OH})$                                 | 9.02   | 10.23   | 1.21 |
| Calcite      | $\text{CaCO}_3$                                                             | 1.85   | 1.97    | 0.13 |
| Liebigite    | $\text{Ca}_2\text{UO}_2(\text{CO}_3)_3 \cdot 10\text{H}_2\text{O}$          | -37.90 | -33.92  | 3.98 |
| Magnesite    | $\text{MgCO}_3$                                                             | -8.91  | -8.80   | 0.11 |
